1 **Title Page**

2 **Article type:** Original Research Article

3 **Title:** Pruritus and its Association with Cancer and Mortality in Dermatomyositis and  
4 Polymyositis: A Nationwide Cohort Study in Taiwan from 2005 to 2022

5 **Contributors:**

6 1. Der-Jr Huang<sup>1</sup>, M.D.

7 2. Yu-Hsuan Joni Shao<sup>2,3,4</sup>, PhD

8 3. Yi-Hsien Shih<sup>1,5,6</sup>, M.D., PhD

9 4. Woan-Ruoh Lee<sup>1</sup>, M.D., PhD

10 5. Ling-Ya Huang<sup>4</sup>

11 6. Yu-Min Kuo<sup>7,8</sup>, M.D., PhD

12 7. Quoc Thao Trang Pham<sup>9,10</sup>, M.D.

13 8. Hao-Jui Weng<sup>1,5,6,9</sup>, M.D., PhD (Orcid: 0000-0002-7006-7599)

14 1 Department of Dermatology, Taipei Medical University-Shuang Ho Hospital, New Taipei  
15 City, Taiwan

16 2 Graduate Institute of Biomedical Informatics, College of Medical Science and Technology,  
17 Taipei Medical University, Taipei, Taiwan

18 3 Clinical Big Data Research Center, Taipei Medical University Hospital, Taipei, Taiwan

19 4 Health Data Analytics and Statistics Center, Office of Data Science, Taipei Medical  
20 University, Taipei, Taiwan

21 5 Department of Dermatology, School of Medicine, College of Medicine, Taipei Medical  
22 University, Taipei, Taiwan

23 6 Graduate Institute of Clinical Medicine, College of Medicine, Taipei Medical University,  
24 Taipei, Taiwan

25 7 Division of Allergy, Immunology and Rheumatology, Department of Internal Medicine,  
26 National Taiwan University, Taipei, Taiwan

27 8 Graduate Institute of Clinical Medicine, College of Medicine, National Taiwan University,  
28 Taipei, Taiwan

29 9 International Ph.D. Program for Cell Therapy and Regeneration Medicine, College of  
30 Medicine, Taipei Medical University, Taipei, Taiwan.

31 10 Department of Dermatology, Faculty of Medicine, University of Medicine and Pharmacy  
32 at Ho Chi Minh City, Ho Chi Minh City, Vietnam.

33

34 **Corresponding author:**

35 Hao-Jui Weng, M.D., PhD, Department of Dermatology, Taipei Medical University-Shuang  
36 Ho Hospital, No. 291, Zhongzheng Rd., Zhonghe District, New Taipei City, 23561, Taiwan,

37 TEL: +886931073192

38 Email: [wenghaojui@tmu.edu.tw](mailto:wenghaojui@tmu.edu.tw)

39 **Declarations**

40 **Funding sources:** This work was supported by Taipei Medical University-Shuang Ho  
41 Hospital, Ministry of Health and Welfare (112YSR-02), and National Science and  
42 Technology Council (110-2314-B-038-028-MY3).

43 **Conflicts of interest/Competing interests:** None to declare.

44 **Consent to participate (including appropriate statements):** Not applicable

45 **Ethical approval:** The study was approved by the Joint Institutional Review Board of Taipei  
46 Medical University (N202403054). The requirement for informed consent was waived by the  
47 Institutional Review Board because the dataset was deidentified.

48 **Prior presentation:** The abstract of this study was presented at EADV Congress 2024 at  
49 Amsterdam on 26 September 2024.

50 **Reprint requests:** None

51 **Data Availability Statement:** Data are available from the National Health Insurance  
52 Research Database (NHIRD) published by the Taiwan National Health Insurance (NHI)  
53 Bureau. Due to legal restrictions imposed by the government of Taiwan in relation to the  
54 Personal Information Protection Act, data cannot be made publicly available. Requests for  
55 data can be sent as a formal proposal to the NHIRD (<https://nhird.nhri.org.tw>).

56

57

58 **Acknowledgments:**

59 We acknowledge the statistical support of the Health Data Analytics and Statistics Center,  
60 Office of Data Science, Taipei Medical University, Taiwan. This work was supported by  
61 Taipei Medical University-Shuang Ho Hospital, Ministry of Health and Welfare (112YSR-02),  
62 and National Science and Technology Council (110-2314-B-038-028-MY3).

63

64 **Author contributions:** DJH conceptualised the study, contributed to the study design and  
65 interpretation of the results, and drafted the manuscript. YHJS contributed to the study  
66 design, data extraction, and analysis, and reviewed the manuscript. WRL and YHS  
67 contributed to the study design and reviewed the manuscript. LYH contributed to the study  
68 design, data analysis, and interpretation of the results, and reviewed the manuscript. YMK  
69 and QTTP contributed to the interpretation of the results and reviewed the manuscript. HJW  
70 conceptualized the study, contributed to the study design and interpretation of the results,  
71 and reviewed the manuscript. All authors had access to the final study results and accepted  
72 responsibility for submitting them for publication. The corresponding author attests that all  
73 listed authors meet authorship criteria and that no others meeting the criteria have been  
74 omitted. HJW is the guarantor.  
75

76 **Manuscript word count:** 3572 words

77 **Abstract word count:** 258 words

78 **References:** 97

79 **Figures:** 2

80 **Tables:** 3

81 **Supplementary tables:** 7

82

83 **Abbreviations:**

84 DM: dermatomyositis

85 PM: polymyositis

86 ILD: interstitial lung disease

87 NHIRD: National Health Insurance Research Database

88 International Classification of Diseases, Ninth Revision: *ICD-9*

89 International Classification of Diseases, Tenth Revision: *ICD-10*

90 HR: hazard ratio

91 CI: confidence interval

92 PG: pruritic group

93 LPG: long-term pruritic group

94 SPG: short-term pruritic group

95 NPG: nonpruritic group

96

97 **Abstract**

98 **Background:**

99 Pruritus is the most common initial symptom reported by patients with dermatomyositis and  
100 polymyositis. However, there is limited data regarding the impact of pruritus on cancer and  
101 mortality in patients with dermatomyositis and polymyositis.

102 **Objective:**

103 To investigate the associations of pruritus to cancer and mortality in patients with  
104 dermatomyositis and polymyositis.

105 **Methods:**

106 This nationwide, population-based retrospective cohort study included adult  
107 dermatomyositis and polymyositis patients from Taiwan's National Health Insurance  
108 Research Database between 2005 and 2022. Sex- and age-matched pruritic patients,  
109 identified by over six weeks of antipruritic medication use, and nonpruritic patients were  
110 analyzed. The primary outcome was cancer occurrence or all-cause mortality.

111 **Results:**

112 Among 919 matched pairs of pruritic and non-pruritic patients, cancer was observed in  
113 19.96% in the long-term pruritic group, 14.63% in the short-term pruritic group, and 10.34%  
114 in the nonpruritic group ( $p < 0.0001$ ). All-cause mortality was documented at 30.37% in the  
115 long-term pruritic group, 29.69% in the short-term pruritic group, and 37.76% in the  
116 nonpruritic group ( $p < 0.0001$ ). Pruritus was associated with an increased risk of cancer  
117 (hazard ratio 1.492, 95% confidence interval 1.093-2.036), and a lower risk of all-cause  
118 mortality (hazard ratio 0.489, 95% confidence interval 0.419-0.571).



119 **Conclusion:**

120 This population-based study revealed pruritus appeared to be associated with increased  
121 cancer risk and decreased all-cause mortality. Thus, pruritus may serve as a pragmatic  
122 factor for risk stratification and tailored treatment strategies in dermatomyositis and  
123 polymyositis. Comprehensive cancer screening is recommended for patients with  
124 dermatomyositis or polymyositis, particularly those presenting with pruritus, whereas  
125 patients without pruritus may require vigilant management for potentially life-threatening  
126 complications and comorbidities.

127

128 **Key points**

- 129 1. Previous single-institutional studies and studies with small cohorts reported conflicting  
130 data regarding the impact of pruritus on cancer and mortality in patients with  
131 dermatomyositis and polymyositis
- 132 2. Pruritus in dermatomyositis and polymyositis appeared to be associated with increased  
133 cancer risk and decreased all-cause mortality.
- 134 3. Our findings suggest that pruritus may serve as a pragmatic factor for risk stratification  
135 and tailored treatment strategies in dermatomyositis and polymyositis.

136

## 137 **1 Introduction**

138 Dermatomyositis (DM) and polymyositis (PM) are rare but debilitating autoimmune diseases.  
139 In the United States, the annual incidence of DM is 9.63 cases per million people.[1] In  
140 Taiwan, DM and PM together occur at a frequency of 11.5 cases per million people.[2] Both  
141 conditions are characterized by progressive symmetrical proximal muscle weakness. DM  
142 also presents distinct skin manifestations, such as pruritus, heliotrope rash, and Gottron's  
143 papules. Additionally, patients with DM and PM have increased risks of cancer, interstitial  
144 lung disease, stroke,[3–6] and ischemic heart disease, [5–7] and possess one of the  
145 poorest prognoses among connective tissue diseases.

146

147 Pruritus is the most common initial symptom reported by patients with DM, and associated  
148 with increased cutaneous severity. Up to 63% to 90% of patients with DM experience  
149 pruritus during the disease course.[1,8,9] Furthermore, pruritus in DM is associated with  
150 poor mental health and has a more significant impact on quality of life than other pruritic  
151 dermatosis, such as psoriasis and atopic dermatitis. [9–12]

152

153 Pruritus has been identified as a notable prognostic factor in several diseases. In conditions  
154 such as Hodgkin's lymphoma[13,14] and hemodialysis,[15] pruritus is associated with  
155 poorer survival. Conversely, in polycythemia vera, pruritus is associated with a lower risk of  
156 arterial thrombosis and improved survival.[16] Furthermore, pruritus might serve as a  
157 marker of occult cancer, regardless of the type of underlying disease.[17] Regarding DM  
158 and PM, previous studies have shown that pruritus was correlated with an elevated risk of  
159 cancers,[18–20] while one study presented contradictory evidence.[21] This discrepancy  
160 highlights the need for large-scale studies to investigate the association between pruritus  
161 and its complications in patients with DM and PM.

162

163 In this study, we investigated the potential association between pruritus and cancer risk in  
164 patients with DM and PM, by using Taiwan's national database and registry. We aimed to  
165 investigate the impact of pruritus on the risk of cancer in DM or PM, and the association  
166 between pruritus and overall survival in these patients. Through our investigation, we  
167 elucidated the clinical importance of pruritus, which may help stratify these patients into  
168 subgroups and guide management strategies in DM and PM.

169

## 170 **2 Methods**

### 171 **2.1 Data sources**

172 All participant data were obtained from the Registry of Catastrophic Illness Database in  
173 Taiwan, a subset of the National Health Insurance Research Database (NHIRD). This  
174 database was established for public research purposes as part of Taiwan's National Health  
175 Insurance Program, which was initiated in 1995 and covered more than 99% of Taiwan's  
176 23 million residents. The case definitions of DM and PM were strictly limited to the ones  
177 who underwent comprehensive clinical and laboratory assessments that met the diagnostic  
178 criteria by Bohan and Peter.[22,23] Only patients with a diagnosis of probable or definite  
179 DM and PM were given the catastrophic illness certificate. The accuracy and validity  
180 regarding dermatomyositis and polymyositis in the Registry of Catastrophic Illness  
181 Database have been well-established in prior studies.[2,24]

182

### 183 **2.2 Study design and participants**

184 Data on patients with DM or PM diagnosed between January 1, 2005, and December 31,  
185 2022, were extracted from the Registry of Catastrophic Illness Database in Taiwan by using

186 the International Classification of Diseases, Ninth Revision (*ICD-9*) and International  
187 Classification of Diseases, Tenth Revision (*ICD-10*) codes (supplementary table S1).  
188 To minimize bias, patients with DM or PM with concurrent conditions potentially associated  
189 with pruritus were excluded, such as atopic dermatitis, urticaria, psoriasis, mycosis  
190 fungoides, and Sezary syndrome (as defined using *ICD-9* and *ICD-10* codes;  
191 supplementary table S1). Additionally, patients undergoing dialysis (as identified using  
192 expenditure codes; supplementary table S1) were excluded. Given the high prevalence of  
193 atopic dermatitis and urticaria, only patients with two consecutive diagnoses of these  
194 conditions were excluded.

195

### 196 **2.3 Definition of pruritus**

197 The index date for a patient with DM or PM was defined as the date of the first medical  
198 record related to the diagnosis. The cases with chronic pruritus were defined based on the  
199 methodology previously outlined by Ting et al.[25] Patients with DM or PM who were  
200 prescribed antipruritic agents for 42 consecutive days or more after the index date were  
201 included in the pruritic group (PG) (as defined using Anatomical Therapeutic Chemical  
202 codes, including systemic or topical antihistamines; menthol lotion; and combination  
203 ointments containing chlorpheniramine maleate, lidocaine hydrochloride, hexachlorophene,  
204 methyl salicylate, menthol, and camphor; supplementary table S2), and further divided into  
205 long-term pruritic group (LPG) for those treated for 84 days or more and short-term pruritic  
206 group (SPG) for those treated for 42 to 83 days. Prescriptions separated by an interval  
207 shorter than 30 days were also considered consecutive. Patients without prescriptions for  
208 antipruritic agents, or those prescribed such agents for less than 42 consecutive days, were  
209 classified into the nonpruritic group (NPG). To exclude other indications for prescribing  
210 antihistamines, prescriptions given under the diagnosis of allergic rhinitis (defined by *ICD-9*

211 and *ICD-10* codes; supplementary table S1) were removed from the prescription records.

212

## 213 **2.4 Outcome measurement**

214 The primary outcomes of interest were cancer and ILD development, as well as mortality.

215 Cancer development was defined as receiving a diagnosis corresponding to the

216 International Classification of Diseases for Oncology, Third Edition codes C00–C97 in the

217 Taiwan Cancer Registry between 2005 and 2022. The diagnoses related to nonmelanoma

218 skin cancer and metastasis were excluded (defined by *ICD-9* and *ICD-10* codes;

219 supplementary table S3). Cancer cases were further categorized into two groups, based on

220 registration date within 5 years prior to, and 10 years after the index date. The mortality and

221 cause of death were determined from 2005 to 2022, using the National Death Registry in

222 Taiwan.

223 To minimize the influence of potential confounding factors, additional factors including age

224 at index date, sex, and comorbidities known to be associated with both outcome risk and

225 pruritus were evaluated. Comorbidities, including diabetes mellitus, hypertension, and other

226 medical conditions were defined by *ICD-9* and *ICD-10* codes documented at least twice in

227 outpatient department visits or once during inpatient admissions before the index date

228 (supplementary table S1).

229

## 230 **2.5 Statistical analysis**

231 The distributions of the demographic characteristics, and comorbidities of the patients with

232 DM and PM, were presented as frequencies (percentages) for categorical variables,

233 medians (with interquartile ranges) for continuous variables, and means  $\pm$  standard

234 deviations for approximately normally distributed continuous variables. Differences in

235 distribution proportions of categorical variables were assessed using the Cochran–Mantel–

236 Haenszel test, whereas the mean differences in continuous variables between the two  
237 groups were evaluated using the generalized estimating equation. Survival analysis was  
238 performed by the Kaplan-Meier method. Hazard ratios (HRs) and 95% confidence intervals  
239 (CIs) were estimated using multivariable Cox proportional-hazard models to investigate the  
240 association between pruritus and the risk of newly diagnosed cancer development and all-  
241 cause mortality. The individual risk of each confounding factor was assessed using simple  
242 Cox proportional-hazard models, and confounders exhibiting significant outcome risks were  
243 subsequently included in multivariable Cox proportional-hazard models for adjustment. All  
244 statistical analyses were conducted using SAS software (version 9.4, SAS Institute, Cary,  
245 NC, USA), with a two-sided p-value of <0.05 considered significant.

246

## 247 **2.6 Sensitivity analyses**

248 To assess the impact of the pruritus definition cutoff point on the outcome measurement,  
249 sensitivity analyses were conducted.

250

## 251 **3 Results**

### 252 **Baseline characteristics of the DM/PM cohort**

253 From 2005 to 2022, 2,723 patients listed on the NHIRD were diagnosed with DM or PM  
254 (Figure 1). Among these patients, 122 were excluded for age younger than 18 years, and  
255 469 were excluded for concomitant pruritus-associated diseases (212 with atopic dermatitis,  
256 95 with urticaria, 122 with psoriasis, 4 with mycosis fungoides, and 90 undergoing dialysis).  
257 A total of 2,132 patients with DM or PM remained. They were categorized into the PG  
258 (1,180 patients) and the NPG (952 patients) based on their antipruritic medication  
259 prescriptions. After matching by date of birth ( $\pm 2$  years) and sex at a ratio of 1:1, 919  
260 patients of DM/PM with pruritus (PG) and 919 without (NPG) were included in the analysis.

261 The demographic data of the overall cohort (patients with DM and PM) were examined.  
262 The average follow-up time was 6.7 years. Our cohort exhibited a female predominance,  
263 with a male-to-female ratio of approximately 1:2 (Table 1). The mean age at the index date  
264 was 52.0 years in the LPG, 51.6 years in the SPG, and 51.8 years in the NPG. No  
265 significant baseline difference in comorbidities was observed.

266

### 267 **3.1 Association between pruritus and cancer**

268 To investigate the association between pruritus and cancers in patients with DM or PM, we  
269 analyzed the prevalence of cancers, before and after the diagnosis of DM and PM, in the  
270 matched groups. For the overall cohort, a higher percentage of patients in the LPG and  
271 SPG developed cancer than in the NPG, over the 5 years prior to, and 10 years after the  
272 index date (Table 2; 19.96% for LPG, 14.63% for SPG, and 10.34% for NPG;  $p < 0.0001$ ).  
273 We next investigated the association between specific cancers and pruritus among patients  
274 with DM or PM. In our cohort, nasopharyngeal cancer, breast cancer, lung cancer, and  
275 colorectal cancer were the most prevalent cancer types, representing 20.2%, 15.4% 15.4%,  
276 and 12.5% of cancers, respectively. Increased prevalence was noted in the pruritic group  
277 for nasopharyngeal cancer (4.72% vs. 1.05%,  $p < 0.0001$ ). A similar trend was observed in  
278 breast cancer (2.83% vs. 1.57%,  $p = 0.05$ ).

279

### 280 **3.2 Association between pruritus and mortality**

281 In contrast to the association observed between cancer and pruritus, we identified a  
282 significantly lower all-cause mortality rate in the LPG and the SPG, than in the NPG (Table  
283 2). Among the overall cohort during the 18-year follow-up period, the all-cause mortality rate  
284 was 30.37% in the LPG, 29.69% in the SPG, and 37.76% in the NPG ( $p < 0.0001$ ).

285 Further analysis of the causes of death in the study population, revealed an elevated risk of



286 cancer-related mortality in the LPG and SPG, among patients with DM and PM. For the  
287 overall cohort, our findings revealed 11.50% of patients in the LPG, and 6.77% of patients  
288 in the SPG, died from various types of cancers, whereas only 5.88% died in the NPG  
289 ( $p=0.04$ ).

290 Kaplan-Meier survival curves for the overall cohort (Figure 2) showed a significant  
291 difference between the PG and the NPG ( $p<0.0001$ ). A higher proportion of deaths in the  
292 NPG occurred within the first year after DM or PM diagnosis, compared to deaths in the PG.  
293 Among the overall cohort, the 1-year survival rate was 95% in the PG, compared to only  
294 77% in the NPG. This disparity was particularly pronounced among patients with DM,  
295 where the 1-year survival rate was 93% in the PG, compared to 68% in the NPG.

296

### 297 **3.3 Hazard ratio analysis of pruritus in DM and PM**

298 To investigate the variables for patients' survival, simple Cox proportional-hazard models  
299 were utilized. The results supported our previous data, that the presence of pruritus during  
300 the disease course, was associated with a higher risk of newly diagnosed cancers for the  
301 overall cohort (supplementary table S5; HR 1.561, 95% CI 1.154-2.111). Subgroup analysis  
302 revealed that long-term pruritus was significantly associated with cancer (HR 1.971, 95% CI  
303 1.416-2.744), while short-term pruritus showed no significant association with cancer.

304 Furthermore, older age of onset, including ages between 40 and 65 years, >65 years, male  
305 sex, diabetes mellitus, hypertension, and vasculitis, were significantly associated with newly  
306 diagnosed cancers.

307 The presence of pruritus, in contrast, was negatively associated with the mortality for  
308 the overall cohort (supplementary table S6; HR 0.564, 95% CI 0.490-0.650). Subgroup  
309 analysis identified both long-term and short-term pruritus were significantly associated with  
310 mortality (HR 0.591, 95% CI 0.494-0.707; HR 0.539, 95% CI 0.450-0.646, respectively).

311 However, older age of onset, including an age between 40 and 65 years, >65 years, male  
312 sex, diabetes mellitus, hypertension, ILD, and cancer, were positively associated with  
313 mortality.

314 In the multivariable analysis for newly diagnosed cancer, adjustment was performed for  
315 significant confounding factors, including sex, age, diabetes, hypertension, vasculitis, and  
316 arthritis. Additionally, ILD and cancer were considered in the analysis of mortality risk. The  
317 multivariate analysis (Table 3) indicated that pruritus was associated with an increased risk  
318 of developing cancer (HR 1.492, 95% CI 1.093-2.036), with a more pronounced effect for  
319 long-term pruritus (HR 1.849, 95% CI 1.314-2.602). Conversely, pruritus was associated  
320 with a lower risk of mortality (HR 0.489, 95% CI 0.419-0.571).

321 The sensitivity analyses confirmed the robustness of the results (supplementary table  
322 S7). We consistently observed associations between pruritus and cancer, as well as  
323 pruritus and mortality, across various pruritus duration thresholds.

324

#### 325 **4 Discussion**

326 This study demonstrated the association between pruritus in patients with DM and PM, and  
327 their comorbidities and prognostic outcomes at a national level. Patients with DM and PM  
328 experiencing pruritus were found to have a higher risk of developing cancers, but a lower  
329 risk of all-cause mortality, compared to nonpruritic patients. This finding was complemented  
330 by similar results in the sensitivity analyses. More than half of our cohort experienced  
331 chronic pruritus, highlighting the need for ongoing and comprehensive screening for  
332 cancers in this high-risk patient population.

333

334 Pruritus has long been documented in autoimmune connective tissue diseases.[26]

335 Approximately 57% of patients with autoimmune connective tissue diseases, irrespective of

336 their specific diagnoses, report pruritus upon their initial presentation.[27] The prevalence of  
337 pruritus varies across different diseases, ranging from 42% to 62% in systemic  
338 sclerosis,[27–30] 38% to 53% in Sjögren syndrome,[31,32] and 63% to 90% in DM.[1,8,9]  
339 Pruritus in lupus erythematosus (LE) is generally considered less severe than that in  
340 DM.[12,27] Studies have indicated that the median pruritus visual analogue scale score in  
341 LE is significantly lower than that observed in DM (3.8 vs. 2.0).[12] Moreover, the majority of  
342 patients with LE experience only mild (45% to 62%) or moderate (54%) pruritus,[27,33]  
343 which contrasts with reports from patients with DM. For the underlying cause, small fiber  
344 neuropathies, paraneoplastic symptoms, and involvement of IL-31 are believed to  
345 contribute to DM-associated itch. Kim et al. revealed upregulation of IL-31 and its receptor  
346 alpha gene in the lesional skin of patients with DM,[9] with IL-31 exhibiting a significant  
347 positive correlation with the severity of itch.

348

349 Assessing antihistamine usage may serve as a surrogate indicator for a patient's pruritus in  
350 our study as previously reported.[25] In clinical practice, sedating antihistamines are  
351 commonly prescribed as first-line treatment for pruritus.[34] They alleviate pruritus by  
352 blocking H1 receptors on C-afferent fiber terminals,[35] preventing mast cell  
353 degranulation,[36,37] and providing a soporific effect. While not all pruritic diseases could  
354 be effectively controlled by antihistamines, most patients with chronic pruritus, regardless of  
355 its cause, will receive H1 antihistamines at some point to alleviate the itch.[38,39]

356 Antihistamines are favored for their proven efficacy in other pruritic dermatosis, such as  
357 chronic idiopathic urticaria,[40–43] atopic dermatitis, and psoriasis,[44] as well as their  
358 affordability, accessibility, and minimal side effects. The cut-off point for antihistamine usage  
359 was set at 6 weeks in our study, as chronic pruritus is defined by the International Forum for  
360 the Study of Itch as itching that persists for over 6 weeks.[45] Short-term antihistamine uses

361 for other conditions such as allergic reactions were excluded.

362

363 Using multivariable Cox proportional-hazard models, we found that DM and PM patients  
364 experiencing pruritus exhibited a significantly higher risk of newly diagnosed cancer (Table  
365 3; adjusted HR 1.492, 95% CI 1.093-2.036). Previous studies show that DM patients with  
366 pruritus may be predisposed to internal malignancies,[18–20] with one contradictory study  
367 of 63 patients in Germany.[21] However, due to limited sample sizes in earlier studies, their  
368 findings regarding the association between pruritus and cancer, appeared inconclusive or  
369 underpowered. Our findings, in contrast, provided robust evidence supporting the notion  
370 that DM and PM patients with pruritus exhibit an elevated risk of cancer.

371

372 Many autoimmune diseases have been associated with a higher risk of developing cancers.  
373 For example, Sjögren's syndrome is associated with an increased risk of non-Hodgkin  
374 lymphoma,[46,47] and systemic lupus erythematosus is associated with non-Hodgkin  
375 lymphoma and lung cancer.[48–50] Additionally, systemic sclerosis is linked to an elevated  
376 risk of lung cancer.[51–53] DM is associated with a higher cancer risk compared with other  
377 autoimmune diseases. Approximately 2.2% to 5% of patients with Sjögren's syndrome  
378 develop cancers,[47,54,55] compared to a higher prevalence of 9.4% to 32.3% among  
379 patients with DM.[2,56–60] Some scholars have postulated that in DM, cancer itself  
380 triggered autoimmunity rather than as the result of disordered immune function or  
381 immunosuppressive drugs, which have been implicated in the pathogenesis of cancer in  
382 other autoimmune diseases.[61–64] In our analysis, the majority of the patients with DM or  
383 PM developed cancers within a year before or after the diagnosis of DM or PM. This is  
384 consistent with the findings of prior research. Furthermore, studies have indicated that the  
385 increased risk of cancers may persist beyond the initial 5-year period. Thus, sustained and

386 comprehensive cancer screening is necessary for patients with DM or PM, particularly  
387 those deemed to be at high risk following their diagnosis.

388

389 The multivariable Cox proportional-hazard models also identified pruritus as a protective  
390 factor against all-cause mortality in patients with DM and PM (Table 3; adjusted HR 0.489,  
391 95% CI 0.419-0.571). Prior studies showed cancer, ILD, infection, and cardiac involvement  
392 as predominant causes of death in DM and PM patients.[65–73] The most common cancer  
393 associated with DM in East Asia is nasopharyngeal carcinoma, however, it is less  
394 associated with immediate patient mortality. In contrast, ILD, particularly rapidly progressive  
395 interstitial lung disease, is associated with high mortality rates within the first year of  
396 diagnosis[74,75], thus, frequently necessitating aggressive immunosuppressive therapy in  
397 ILD patients.[76–79] Further analysis of death causes, revealed a higher incidence of  
398 deaths from infection in the non-pruritic group (NPG), within the first year of DM or PM  
399 diagnosis. This supports the concept that non-pruritic patients may require higher doses of  
400 steroids and immunosuppressants, to manage their disease.

401

402 The survival curve indicated a marked decline in survival during the first year in the NPG, a  
403 pattern not observed in the pruritic group (PG). Previous studies illustrated that lung  
404 complications are the major cause of death within the first 12 months, following DM and PM  
405 diagnosis.[80,81] This disparity in survival between the PG and NPG was even more  
406 pronounced among DM patients. It is well-documented that DM is associated with a poorer  
407 prognosis compared to PM, particularly concerning ILD[82] and cancer-related  
408 mortality.[83,84] However, although no significant difference in ILD prevalence was  
409 observed between the PG and NPG, the clinical course of ILD may vary considerably.  
410 Rapidly progressive ILD is associated with significantly poorer prognosis, compared to

411 chronic ILD. This form of ILD is more prevalent in DM than in other connective tissue  
412 diseases,[85] and has been extensively reported in Asia, including Japan, Hong Kong, and  
413 Taiwan.[86–89]

414

415 Several hypotheses may explain the paradoxical finding of higher cancer risks but lower all-  
416 cause mortality rates in our pruritic DM and PM patients. First, disease severity in the  
417 nonpruritic group might be higher than in the pruritic group and required a higher dosage of  
418 immunosuppressant. We observed that more patients in the nonpruritic group died from  
419 infection, which was consistent with our hypothesis that nonpruritic patients require higher  
420 dosages of immunosuppressants to control their disease. Secondly, the nonpruritic group  
421 might consist of a higher prevalence of overlap syndrome. Researchers have categorized  
422 DM into two groups: pure DM and overlap myositis with dermatomyositis features (OMDM).  
423 [90] Pure DM is associated with higher cancer risks but an excellent 15-year survival rate of  
424 92%. By contrast, patients with OMDM often develop myositis before cutaneous symptoms,  
425 and possess a decreased 15-year survival rate of 65%. Thirdly, distinct myositis-specific  
426 and myositis-associated autoantibodies might be involved in the pathogenesis of pruritic  
427 and nonpruritic patients. Several autoantibodies may be candidates for pruritic and  
428 nonpruritic conditions. Anti-transcriptional intermediary factor 1  $\gamma$  (anti-TIF1 $\gamma$ ) antibodies  
429 and anti-small ubiquitin-like modifier-1 activating enzyme (anti-SAE) antibodies are often  
430 associated with extensive skin involvement and a higher risk of cancer.[91–95] Conversely,  
431 patients with anti-melanoma differentiation-associated protein 5 (anti-MDA5) antibodies and  
432 anti-signal recognition particle (anti-SRP) antibodies typically present with less pruritic skin  
433 lesions, and a poor prognosis, despite having a lower risk of cancer.[91,96,97]Further  
434 investigation is warranted to prove our hypotheses.

435

436 This study has several limitations. First, because our analysis relied on data from an  
437 administrative database, some potential ascertainment problems were unavoidable,  
438 including coding errors and mortality misclassifications. However, differences in coding  
439 error between the pruritic and non-pruritic groups are unlikely. Additionally, our study  
440 benefited from the stringent regulation of Taiwan's Registry of Catastrophic Illness  
441 Database, which requires DM or PM cases to meet the criteria set by Bohan and  
442 Peter.[22,23] Secondly, although assessing pruritus through prescription medication is an  
443 objective and quantitative approach, it inevitably underestimates patients with mild pruritus  
444 who did not require a prescription, those who discontinued antipruritic medication due to  
445 non-responsiveness, and those who used over-the-counter medications or traditional  
446 Chinese herbal treatments for pruritus. Thirdly, we were unable to analyze clinical  
447 parameters such as cutaneous manifestations other than pruritus, laboratory parameters,  
448 and myositis-associated or specific antibodies because of the inherent limitations of the  
449 NHIRD. Finally, given that the population data were derived from a single country (Taiwan),  
450 particularly the significant association of dermatomyositis to nasopharyngeal cancer, further  
451 research is required to assess the generalizability and reproducibility of these findings in  
452 other populations.

453

## 454 **5 Conclusions**

455 This study employed nationwide insurance administration data, and revealed a  
456 significant association between pruritus and cancer, as well as cancer-related mortality, in  
457 patients with DM and PM. Thus, comprehensive cancer screening is recommended for  
458 patients with DM or PM, particularly those presenting with pruritus. Notably, nonpruritic  
459 patients were associated with a higher risk of all-cause mortality, especially during the first  
460 year after diagnosis. Therefore, patients without pruritus may require vigilant management

461 for potentially life-threatening complications and comorbidities.



## Reference

1. Bendewald MJ, Wetter DA, Li X, Davis MDP. Incidence of dermatomyositis and clinically amyopathic dermatomyositis: A population-based study in Olmsted County, Minnesota. *Arch Dermatol*. 2010 Jan;146(1):26–30.
2. Kuo CF, See LC, Yu KH, Chou IJ, Chang HC, Chiou MJ, Luo SF. Incidence, cancer risk and mortality of dermatomyositis and polymyositis in Taiwan: A nationwide population study. *British Journal of Dermatology*. 2011 Dec;165(6):1273–9.
3. Ungprasert P, Cheungpasitporn W, Wijarnpreecha K, Ahuja W, Ratanasrimetha P, Thongprayoon C. Risk of ischemic stroke in patients with polymyositis and dermatomyositis: a systematic review and meta-analysis. *Rheumatol Int*. 2015 May 1;35(5):905–9.
4. Zhen C, Wang Y, Wang H, Wang X. The risk of ischemic stroke in patients with idiopathic inflammatory myopathies: a systematic review and meta-analysis. *Clin Rheumatol*. 2021 Oct 1;40(10):4101–8.
5. Rai SK, Choi HK, Sayre EC, Antonio Aviña-Zubieta J. Risk of myocardial infarction and ischaemic stroke in adults with polymyositis and dermatomyositis: A general population-based study. *Rheumatology (United Kingdom)*. 2016 Mar 1;55(3):461–9.
6. Lai YT, Dai YS, Yen MF, Chen LS, Chen HH, Cooper RG, Pan SL. Dermatomyositis is associated with an increased risk of cardiovascular and cerebrovascular events: A Taiwanese population-based longitudinal follow-up study. *British Journal of Dermatology*. 2013 May;168(5):1054–9.
7. Xiong A, Hu Z, Zhou S, Qiang Y, Song Z, Chen H, Xiang Q, Zhang Y, Cao Y, Cui H, Luo J, Wang Y, Yang Y, Cui B, Li M, Shuai S. Cardiovascular events in adult polymyositis and dermatomyositis: A meta-analysis of observational studies. Vol. 61, *Rheumatology (United Kingdom)*. Oxford University Press; 2022. p. 2728–39.

8. Yosipovitch G, Tan A, Losicco K, Manabat CG, Kannagra A, Carroll C, Chan YH, Ng P, Jorizzo J. A comparative study of clinical characteristics, work-up, treatment, and association to malignancy in dermatomyositis between two tertiary skin centers in the USA and Singapore. *Int J Dermatol*. 2013 Jul;52(7):813–9.
9. Kim HJ, Zeidi M, Bonciani D, Pena SM, Tiao J, Sahu S, Werth VP. Itch in dermatomyositis: the role of increased skin interleukin-31. *British Journal of Dermatology*. 2018 Sep 1;179(3):669–78.
10. Hundley JL, Carroll CL, Lang W, Snively B, Yosipovitch G, Feldman SR, Jorizzo JL. Cutaneous symptoms of dermatomyositis significantly impact patients' quality of life. *J Am Acad Dermatol*. 2006 Feb;54(2):217–20.
11. Shirani Z, Kucenic MJ, Carroll CL, Fleischer AB, Feldman SR, Yosipovitch G, Jorizzo JL. Pruritus in adult dermatomyositis. *Clin Exp Dermatol*. 2004 May;29(3):273–6.
12. Goreshi R, Chock M, Foering K, Feng R, Okawa J, Rose M, Fiorentino D, Werth V. Quality of life in dermatomyositis. *J Am Acad Dermatol*. 2011 Dec;65(6):1107–16.
13. Gobbi PG, Attardo-Parrinello G, Lattanzio G, Rizzo SC, Ascari E. Severe pruritus should be a B-symptom in Hodgkin's disease. *Cancer*. 1983;51(10):1934–6.
14. Feiner AS, Mahmood T, Wallner SF. Prognostic importance of pruritus in Hodgkin's disease. *JAMA*. 1978 Dec 15;240(25):2738–40.
15. Narita I, Alchi B, Omori K, Sato F, Ajiro J, Saga D, Kondo D, Skatsume M, Maruyama S, Kazama JJ, Akazawa K, Gejyo F. Etiology and prognostic significance of severe uremic pruritus in chronic hemodialysis patients. *Kidney Int*. 2006 May;69(9):1626–32.
16. Gangat N, Strand JJ, Lasho TL, Li CY, Pardanani A, Tefferi A. Pruritus in polycythemia vera is associated with a lower risk of arterial thrombosis. *Am J Hematol*. 2008 Jun;83(6):451–3.

17. Johannesdottir SA, Farkas DK, Vinding GR, Pedersen L, Lamberg A, Sørensen HT, Olesen AB. Cancer incidence among patients with a hospital diagnosis of pruritus: A nationwide Danish cohort study. *British Journal of Dermatology*. 2014 Oct 1;171(4):839–46.
18. Su HJ, Chung WH, Lin CY. The associations between myositis autoantibodies and clinical presentations in dermatomyositis. *Australasian Journal of Dermatology*. 2022 Nov 1;63(4):479–87.
19. Gallais V, Crickx B, Belaich S. [Prognostic factors and predictive signs of malignancy in adult dermatomyositis]. *Ann Dermatol Venereol*. 1996;123(11):722–6.
20. Basset-Seguín N. Prognostic Factors and Predictive Signs of Malignancy in Adult Dermatomyositis. *Arch Dermatol*. 1990 May 1;126(5):633.
21. Lauinger J, Ghoreschi K, Volc S. Characteristics of dermatomyositis patients with and without associated malignancy. *JDDG - Journal of the German Society of Dermatology*. 2021 Nov 1;19(11):1601–11.
22. Bohan A, Peter JB. Polymyositis and Dermatomyositis. *New England Journal of Medicine*. 1975 Feb 20;292(8):403–7.
23. Bohan A, Peter JB. Polymyositis and Dermatomyositis. *New England Journal of Medicine*. 1975 Feb 13;292(7):344–7.
24. Chung WS, Lin CL, Sung FC, Lu CC, Kao CH. Increased Risk of Venous Thromboembolism in Patients with Dermatomyositis/Polymyositis: A Nationwide Cohort Study. *Thromb Res*. 2014 Sep;134(3):622–6.
25. Ting SW, Fan PC, Lin YS, Lin MS, Lee CC, Kuo G, Chang CH. Association between uremic pruritus and long-term outcomes in patients undergoing dialysis. *J Am Acad Dermatol*. 2020 Sep;83(3):924–5.
26. Kim HJ. Pruritus in autoimmune connective tissue diseases. *Ann Transl Med*. 2021

Mar;9(5):441–441.

27. Yahya A, Gideon P. S. Characterizing Pruritus in Autoimmune Connective Tissue Diseases. *J Drugs Dermatol*. 2019 Oct 1;18(10):995–8.
28. Razykov I, Levis B, Hudson M, Baron M, Thombs BD. Prevalence and clinical correlates of pruritus in patients with systemic sclerosis: an updated analysis of 959 patients. *Rheumatology*. 2013 Nov;52(11):2056–61.
29. Razykov I, Thombs BD, Hudson M, Bassel M, Baron M, Canadian Scleroderma Research Group. Prevalence and clinical correlates of pruritus in patients with systemic sclerosis. *Arthritis Rheum*. 2009 Dec 15;61(12):1765–70.
30. Théréne C, Brenaut E, Sonbol H, Pasquier E, Saraux A, Devauchelle V, Le Moigne E, Misery L, Abasq-Thomas C. Itch and systemic sclerosis: frequency, clinical characteristics and consequences. *Br J Dermatol*. 2017 May;176(5):1392–3.
31. Bernacchi E, Amato L, Parodi A, Cottoni F, Rubegni P, De Pità O, Papini M, Rebora A, Bombardieri S, Fabbri P. Sjögren's syndrome: a retrospective review of the cutaneous features of 93 patients by the Italian Group of Immunodermatology. *Clin Exp Rheumatol*. 2004;22(1):55–62.
32. Valdes-Rodriguez R, Rowe B, Lee H, Moldovan T, Chan Y, Blum M, Yosipovitch G. Chronic Pruritus in Primary Sjögren's Syndrome: Characteristics and Effect on Quality of Life. *Acta Dermato Venereologica*. 2017;97(3):385–6.
33. Samotij D, Szczęch J, Kushner CJ, Mowla MR, Dańczak-Pazdrowska A, Antiga E, Chasset F, Furukawa F, Hasegawa M, Hashizume H, Islam A, Ikeda T, Lesiak A, Polańska A, Misery L, Szepietowski JC, Tsuruta D, Adamski Z, Werth VP, Reich A. Prevalence of Pruritus in Cutaneous Lupus Erythematosus: Brief Report of a Multicenter, Multinational Cross-Sectional Study. *Biomed Res Int*. 2018;2018:3491798.

34. Yosipovitch G, Bernhard JD. Chronic Pruritus. *New England Journal of Medicine*. 2013 Apr 25;368(17):1625–34.
35. Thurmond RL, Gelfand EW, Dunford PJ. The role of histamine H1 and H4 receptors in allergic inflammation: the search for new antihistamines. *Nat Rev Drug Discov*. 2008 Jan;7(1):41–53.
36. Vasiadi M, Kalogeromitros D, Kempuraj D, Clemons A, Zhang B, Chliva C, Makris M, Wolfberg A, House M, Theoharides TC. Rupatadine Inhibits Proinflammatory Mediator Secretion from Human Mast Cells Triggered by Different Stimuli. *Int Arch Allergy Immunol*. 2010;151(1):38–45.
37. Weller K, Maurer M. Desloratadine Inhibits Human Skin Mast Cell Activation and Histamine Release. *Journal of Investigative Dermatology*. 2009 Nov;129(11):2723–6.
38. Song J, Xian D, Yang L, Xiong X, Lai R, Zhong J. Pruritus: Progress toward Pathogenesis and Treatment. *Biomed Res Int*. 2018;2018:1–12.
39. Greaves MW. Pathogenesis and Treatment of Pruritus. *Curr Allergy Asthma Rep*. 2010 Jul 29;10(4):236–42.
40. Ring J, Hein R, Gauger A, Bronsky E, Miller B. Once-daily desloratadine improves the signs and symptoms of chronic idiopathic urticaria: a randomized, double-blind, placebo-controlled study. *Int J Dermatol*. 2001 Jan 21;40(1):72–6.
41. Ortonne JP, Grob JJ, Auquier P, Dreyfus I. Efficacy and Safety of Desloratadine in Adults with Chronic Idiopathic Urticaria. *Am J Clin Dermatol*. 2007;8(1):37–42.
42. Monroe E, Finn A, Patel P, Guerrero R, Ratner P, Bernstein D. Efficacy and safety of desloratadine 5 mg once daily in the treatment of chronic idiopathic urticaria: A double-blind, randomized, placebo-controlled trial\*. *J Am Acad Dermatol*. 2003 Apr;48(4):535–41.

43. Grob J, Auquier P, Dreyfus I, Ortonne J. Quality of life in adults with chronic idiopathic urticaria receiving desloratadine: a randomized, double-blind, multicentre, placebo-controlled study. *Journal of the European Academy of Dermatology and Venereology*. 2008 Jan 20;22(1):87–93.
44. Yosipovitch G, Goon A, Wee J, Chan YH, Goh CL. The prevalence and clinical characteristics of pruritus among patients with extensive psoriasis. *British Journal of Dermatology*. 2000 Nov 27;143(5):969–73.
45. Ständer S, Weisshaar E, Mettang T, Szepietowski J, Carstens E, Ikoma A, Bergasa N, Gieler U, Misery L, Wallengren J, Darsow U, Streit M, Metze D, Luger T, Greaves M, Schmelz M, Yosipovitch G, Bernhard J. Clinical Classification of Itch: a Position Paper of the International Forum for the Study of Itch. *Acta Derm Venereol*. 2007;87(4):291–4.
46. Theander E. Lymphoma and other malignancies in primary Sjogren's syndrome: a cohort study on cancer incidence and lymphoma predictors. *Ann Rheum Dis*. 2006 Jun 1;65(6):796–803.
47. Tzioufas AG, Voulgarelis M. Update on Sjögren's syndrome autoimmune epithelitis: from classification to increased neoplasias. *Best Pract Res Clin Rheumatol*. 2007 Dec;21(6):989–1010.
48. Ekström Smedby K, Vajdic CM, Falster M, Engels EA, Martínez-Maza O, Turner J, Hjalgrim H, Vineis P, Seniori Costantini A, Bracci PM, Holly EA, Willett E, Spinelli JJ, La Vecchia C, Zheng T, Becker N, De Sanjosé S, Chiu BCH, Dal Maso L, Cocco P, Maynadié M, Foretova L, Staines A, Brennan P, Davis S, Severson R, Cerhan JR, Breen EC, Birmann B, Grulich AE, Cozen W. Autoimmune disorders and risk of non-Hodgkin lymphoma subtypes: a pooled analysis within the InterLymph Consortium. *Blood*. 2008 Apr 15;111(8):4029–38.

49. Bernatsky S. Non-Hodgkin's lymphoma in systemic lupus erythematosus. *Ann Rheum Dis.* 2005 Oct 1;64(10):1507–9.
50. Bernatsky S, Boivin JF, Joseph L, Rajan R, Zoma A, Manzi S, Ginzler E, Urowitz M, Gladman D, Fortin PR, Petri M, Edworthy S, Barr S, Gordon C, Bae SC, Sibley J, Isenberg D, Rahman A, Aranow C, Dooley MA, Steinsson K, Nived O, Sturfelt G, Alarcón G, Senécal JL, Zummer M, Hanly J, Ensworth S, Pope J, El-Gabalawy H, McCarthy T, St. Pierre Y, Ramsey-Goldman R, Clarke A. An international cohort study of cancer in systemic lupus erythematosus. *Arthritis Rheum.* 2005 May 5;52(5):1481–90.
51. Bussone G, Mouthon L. Interstitial lung disease in systemic sclerosis. *Autoimmun Rev.* 2011 Mar;10(5):248–55.
52. Derk CT, Rasheed M, Artlett CM, Jimenez SA. A cohort study of cancer incidence in systemic sclerosis. *J Rheumatol.* 2006 Jun;33(6):1113–6.
53. Pontifex EK, Hill CL, Roberts-Thomson P. Risk factors for lung cancer in patients with scleroderma: a nested case-control study. *Ann Rheum Dis.* 2006 Sep 19;66(4):551–3.
54. Zhang W, Feng S, Yan S, Zhao Y, Li M, Sun J, Zhang FC, Cui Q, Dong Y. Incidence of malignancy in primary Sjogren's syndrome in a Chinese cohort. *Rheumatology.* 2010 Mar 1;49(3):571–7.
55. Weng MY, Huang YT, Liu MF, Lu TH. Incidence of cancer in a nationwide population cohort of 7852 patients with primary Sjögren's syndrome in Taiwan. *Ann Rheum Dis.* 2012 Apr;71(4):524–7.
56. Hill CL, Zhang Y, Sigurgeirsson B, Pukkala E, Mellekjaer L, Airio A, Evans SR, Felson DT. Frequency of specific cancer types in dermatomyositis and polymyositis: A population-based study. *Lancet.* 2001 Jan 13;357(9250):96–100.

57. Sigurgeirsson B, Lindelöf B, Edhag O, Allander E. Risk of Cancer in Patients with Dermatomyositis or Polymyositis. *New England Journal of Medicine* [Internet]. 1992 Feb 6;326(6):363–7. Available from: <http://www.nejm.org/doi/abs/10.1056/NEJM199202063260602>
58. Stockton D, Doherty VR, Brewster DH. Risk of cancer in patients with dermatomyositis or polymyositis, and follow-up implications: A Scottish population-based cohort study. *Br J Cancer*. 2001 Jul 6;85(1):41–5.
59. Motomura K, Yamashita H, Yamada S, Takahashi Y, Kaneko H. Clinical characteristics and prognosis of polymyositis and dermatomyositis associated with malignancy: a 25-year retrospective study. *Rheumatol Int*. 2019 Oct 1;39(10):1733–9.
60. Chen YJ, Wu CY, Huang YL, Wang CB, Shen JL, Chang YT. Cancer risks of dermatomyositis and polymyositis: a nationwide cohort study in Taiwan. *Arthritis Res Ther*. 2010;12(2):R70.
61. Zantos D, Zhang Y, Felson D. The overall and temporal association of cancer with polymyositis and dermatomyositis. *J Rheumatol*. 1994 Oct;21(10):1855–9.
62. Abu-Shakra M. Cancer and autoimmunity: autoimmune and rheumatic features in patients with malignancies. *Ann Rheum Dis*. 2001 May 1;60(5):433–41.
63. András C, Csiki Z, Ponyi A, Illés Á, Dankó K. Paraneoplastic rheumatic syndromes. *Rheumatol Int*. 2006 Mar 10;26(5):376–82.
64. Maria José Leandro DAI. Rheumatic diseases and malignancy □? is there an association? *Scand J Rheumatol*. 2001 Jan 12;30(4):185–8.
65. Sigurgeirsson B, Lindelöf B, Edhag O, Allander E. Risk of cancer in patients with dermatomyositis or polymyositis. A population-based study. *N Engl J Med*. 1992 Feb 6;326(6):363–7.
66. Dankó K, Ponyi A, Constantin T, Borgulya G, Szegedi G. Long-term survival of



- patients with idiopathic inflammatory myopathies according to clinical features: a longitudinal study of 162 cases. *Medicine*. 2004 Jan;83(1):35–42.
67. Bronner IM, van der Meulen MFG, de Visser M, Kalmijn S, van Venrooij WJ, Voskuyl AE, Dinant HJ, Linssen WHJP, Wokke JHJ, Hoogendijk JE. Long-term outcome in polymyositis and dermatomyositis. *Ann Rheum Dis*. 2006 Nov;65(11):1456–61.
  68. Santo AH, Souza JMP, Pinheiro CE, Souza DC, Sato EI. Trends in dermatomyositis- and polymyositis-related mortality in the state of São Paulo, Brazil, 1985-2007: multiple cause-of-death analysis. *BMC Public Health*. 2010 Oct 11;10:597.
  69. Hamaguchi Y, Kuwana M, Hoshino K, Hasegawa M, Kaji K, Matsushita T, Komura K, Nakamura M, Koderia M, Suga N, Higashi A, Ogusu K, Tsutsui K, Furusaki A, Tanabe H, Sasaoka S, Muro Y, Yoshikawa M, Ishiguro N, Ayano M, Muroi E, Fujikawa K, Umeda Y, Kawase M, Mabuchi E, Asano Y, Sodemoto K, Seishima M, Yamada H, Sato S, Takehara K, Fujimoto M. Clinical correlations with dermatomyositis-specific autoantibodies in adult Japanese patients with dermatomyositis: a multicenter cross-sectional study. *Arch Dermatol*. 2011 Apr;147(4):391–8.
  70. Limaye V, Hakendorf P, Woodman RJ, Blumbergs P, Roberts-Thomson P. Mortality and its predominant causes in a large cohort of patients with biopsy-determined inflammatory myositis. *Intern Med J*. 2012 Feb;42(2):191–8.
  71. Marie I. Morbidity and mortality in adult polymyositis and dermatomyositis. *Curr Rheumatol Rep*. 2012 Jun;14(3):275–85.
  72. Schioppa E, Phillips K, MacDonald PM, Crofford LJ, Somers EC. Predictors of survival in a cohort of patients with polymyositis and dermatomyositis: effect of corticosteroids, methotrexate and azathioprine. *Arthritis Res Ther*. 2012 Jan 27;14(1):R22.
  73. Limaye V, Hakendorf P, Woodman RJ, Blumbergs P, Roberts-Thomson P. Mortality and its predominant causes in a large cohort of patients with biopsy-determined

- inflammatory myositis. *Intern Med J.* 2012 Feb;42(2):191–8.
74. So J, So H, Wong VTL, Ho R, Wu TY, Wong PCH, Tam LHP, Ho C, Lam TTO, Chung YK, Li WL, To CH, Lau CS, Mok CC, Tam LS. Predictors of rapidly progressive interstitial lung disease and mortality in patients with autoantibodies against melanoma differentiation-associated protein 5 dermatomyositis. *Rheumatology (Oxford).* 2022 Nov 2;61(11):4437–44.
75. Won Huh J, Soon Kim D, Keun Lee C, Yoo B, Bum Seo J, Kitaichi M, Colby T V. Two distinct clinical types of interstitial lung disease associated with polymyositis-dermatomyositis. *Respir Med.* 2007 Aug;101(8):1761–9.
76. Suda T, Fujisawa T, Enomoto N, Nakamura Y, Inui N, Naito T, Hashimoto D, Sato J, Toyoshima M, Hashizume H, Chida K. Interstitial lung diseases associated with amyopathic dermatomyositis. *Eur Respir J.* 2006 Nov;28(5):1005–12.
77. Kang EH, Lee EB, Shin KC, Im CH, Chung DH, Han SK, Song YW. Interstitial lung disease in patients with polymyositis, dermatomyositis and amyopathic dermatomyositis. *Rheumatology (Oxford).* 2005 Oct;44(10):1282–6.
78. Wang H, Lv J, He J, Wu W, Zhong Y, Cao S, Cai Y, Wang Q. The prevalence and effects of treatments of rapidly progressive interstitial lung disease of dermatomyositis/polymyositis adults: A systematic review and meta-analysis. *Autoimmun Rev.* 2023 Aug;22(8):103335.
79. Marie I, Hatron PY, Dominique S, Cherin P, Mouthon L, Menard JF. Short-term and long-term outcomes of interstitial lung disease in polymyositis and dermatomyositis: a series of 107 patients. *Arthritis Rheum.* 2011 Nov;63(11):3439–47.
80. Dankó K, Ponyi A, Constantin T, Borgulya G, Szegedi G. Long-term survival of patients with idiopathic inflammatory myopathies according to clinical features: a longitudinal study of 162 cases. *Medicine.* 2004 Jan;83(1):35–42.

81. Yamasaki Y, Yamada H, Ohkubo M, Yamasaki M, Azuma K, Ogawa H, Mizushima M, Ozaki S. Longterm survival and associated risk factors in patients with adult-onset idiopathic inflammatory myopathies and amyopathic dermatomyositis: experience in a single institute in Japan. *J Rheumatol*. 2011 Aug;38(8):1636–43.
82. Fujisawa T, Suda T, Nakamura Y, Enomoto N, Ide K, Toyoshima M, Uchiyama H, Tamura R, Ida M, Yagi T, Yasuda K, Genma H, Hayakawa H, Chida K, Nakamura H. Differences in clinical features and prognosis of interstitial lung diseases between polymyositis and dermatomyositis. *J Rheumatol*. 2005 Jan;32(1):58–64.
83. Airio A, Kautiainen H, Hakala M. Prognosis and mortality of polymyositis and dermatomyositis patients. *Clin Rheumatol*. 2006 Mar;25(2):234–9.
84. Yamasaki Y, Yamada H, Ohkubo M, Yamasaki M, Azuma K, Ogawa H, Mizushima M, Ozaki S. Longterm survival and associated risk factors in patients with adult-onset idiopathic inflammatory myopathies and amyopathic dermatomyositis: experience in a single institute in Japan. *J Rheumatol*. 2011 Aug;38(8):1636–43.
85. Won Huh J, Soon Kim D, Keun Lee C, Yoo B, Bum Seo J, Kitaichi M, Colby T V. Two distinct clinical types of interstitial lung disease associated with polymyositis-dermatomyositis. *Respir Med*. 2007 Aug;101(8):1761–9.
86. Lee CS, Chen TL, Tzen CY, Lin FJ, Peng MJ, Wu CL, Chen PJ. Idiopathic inflammatory myopathy with diffuse alveolar damage. *Clin Rheumatol*. 2002 Sep;21(5):391–6.
87. Kang EH, Lee EB, Shin KC, Im CH, Chung DH, Han SK, Song YW. Interstitial lung disease in patients with polymyositis, dermatomyositis and amyopathic dermatomyositis. *Rheumatology (Oxford)*. 2005 Oct;44(10):1282–6.
88. Hamaguchi Y, Kuwana M, Hoshino K, Hasegawa M, Kaji K, Matsushita T, Komura K, Nakamura M, Koderia M, Suga N, Higashi A, Ogusu K, Tsutsui K, Furusaki A, Tanabe

- H, Sasaoka S, Muro Y, Yoshikawa M, Ishiguro N, Ayano M, Muroi E, Fujikawa K, Umeda Y, Kawase M, Mabuchi E, Asano Y, Sodemoto K, Seishima M, Yamada H, Sato S, Takehara K, Fujimoto M. Clinical correlations with dermatomyositis-specific autoantibodies in adult Japanese patients with dermatomyositis: a multicenter cross-sectional study. *Arch Dermatol*. 2011 Apr;147(4):391–8.
89. Wang H, Lv J, He J, Wu W, Zhong Y, Cao S, Cai Y, Wang Q. The prevalence and effects of treatments of rapidly progressive interstitial lung disease of dermatomyositis/polymyositis adults: A systematic review and meta-analysis. *Autoimmun Rev*. 2023 Aug;22(8):103335.
90. Troyanov Y, Targoff IN, Payette MP, Raynauld JP, Chartier S, Goulet JR, Bourré-Tessier J, Rich E, Grodzicky T, Fritzler MJ, Joyal F, Koenig M, Sénécal JL. Redefining dermatomyositis: A description of new diagnostic criteria that differentiate pure dermatomyositis from overlap myositis with dermatomyositis features. *Medicine (United States)*. 2014 Nov 1;93(24):318–32.
91. Hoshino K, Muro Y, Sugiura K, Tomita Y, Nakashima R, Mimori T. Anti-MDA5 and anti-TIF1- $\gamma$  antibodies have clinical significance for patients with dermatomyositis. *Rheumatology*. 2010 Sep;49(9):1726–33.
92. Fiorentino DF, Kuo K, Chung L, Zaba L, Li S, Casciola-Rosen L. Distinctive cutaneous and systemic features associated with antitranscriptional intermediary factor-1 $\gamma$  antibodies in adults with dermatomyositis. *J Am Acad Dermatol*. 2015 Mar;72(3):449–55.
93. Fujimoto M, Hamaguchi Y, Kaji K, Matsushita T, Ichimura Y, Kodera M, Ishiguro N, Ueda-Hayakawa I, Asano Y, Ogawa F, Fujikawa K, Miyagi T, Mabuchi E, Hirose K, Akimoto N, Hatta N, Tsutsui K, Higashi A, Igarashi A, Seishima M, Hasegawa M,

- Takehara K. Myositis-specific anti-155/140 autoantibodies target transcription intermediary factor 1 family proteins. *Arthritis Rheum*. 2012 Feb 27;64(2):513–22.
94. Fiorentino DF, Chung LS, Christopher-Stine L, Zaba L, Li S, Mammen AL, Rosen A, Casciola-Rosen L. Most Patients With Cancer-Associated Dermatomyositis Have Antibodies to Nuclear Matrix Protein NXP-2 or Transcription Intermediary Factor 1 $\gamma$ . *Arthritis Rheum*. 2013 Nov 28;65(11):2954–62.
95. Betteridge ZE, Gunawardena H, Chinoy H, North J, Ollier WER, Cooper RG, McHugh NJ. Clinical and human leucocyte antigen class II haplotype associations of autoantibodies to small ubiquitin-like modifier enzyme, a dermatomyositis-specific autoantigen target, in UK Caucasian adult-onset myositis. *Ann Rheum Dis*. 2009 Oct 1;68(10):1621–5.
96. DeWane ME, Waldman R, Lu J. Dermatomyositis: Clinical features and pathogenesis. *J Am Acad Dermatol*. 2020 Feb;82(2):267–81.
97. Watanabe Y, Uruha A, Suzuki S, Nakahara J, Hamanaka K, Takayama K, Suzuki N, Nishino I. Clinical features and prognosis in anti-SRP and anti-HMGCR necrotising myopathy. *J Neurol Neurosurg Psychiatry*. 2016 Oct;87(10):1038–44.

## Figure Captions

**Fig 1** Study design. Patients with dermatomyositis and polymyositis were extracted from National Health Insurance Research Database in Taiwan from 2005 to 2022.

**Fig 2** Survival curves. Upper, overall cohort (dermatomyositis and polymyositis); middle, dermatomyositis; lower, polymyositis.

## Tables

**Table 1. Distributions of baseline characteristics in dermatomyositis and polymyositis cohort, by pruritus status, in 2005–2022.**

|                                       | Overall cohort  |                 |                 |      | Dermatomyositis |                 |                 |      | Polymyositis    |                 |                 |      |
|---------------------------------------|-----------------|-----------------|-----------------|------|-----------------|-----------------|-----------------|------|-----------------|-----------------|-----------------|------|
|                                       | LPG<br>N=461    | SPG<br>N=458    | NPG<br>N=919    | p    | LPG<br>N=288    | SPG<br>N=242    | NPG<br>N=427    | p    | LPG<br>N=173    | SPG<br>N=216    | NPG<br>N=492    | p    |
| Male, n (%)                           | 164<br>(35.57)  | 160<br>(34.93)  | 324<br>(35.26)  | -    | 104<br>(36.11)  | 86<br>(35.54)   | 147<br>(34.43)  | -    | 60<br>(34.68)   | 74<br>(34.26)   | 177<br>(35.98)  | -    |
| <b>Age at index date, year, n (%)</b> |                 |                 |                 |      |                 |                 |                 |      |                 |                 |                 |      |
| mean (SD)                             | 52.0<br>(14.15) | 51.6<br>(14.91) | 51.8<br>(14.62) | 0.94 | 52.2<br>(10.01) | 50.9<br>(14.82) | 52.1<br>(14.40) | 0.32 | 51.7<br>(14.40) | 52.3<br>(15.01) | 51.5<br>(14.83) | 0.52 |
| median (IQR)                          | 53<br>(42-62)   | 53<br>(41-62)   | 52<br>(41-63)   |      | 53<br>(42-62)   | 51<br>(41-62)   | 51<br>(42-62)   |      | 53<br>(41-62)   | 54<br>(43-62)   | 53<br>(41-63)   |      |
| min, max                              | 18, 88          | 18, 87          | 18, 89          |      | 18, 88          | 18, 86          | 18, 89          |      | 20, 84          | 19, 87          | 18, 87          |      |
| < 40                                  | 94<br>(20.39)   | 94<br>(20.52)   | 192<br>(20.89)  | 0.76 | 57<br>(19.79)   | 47<br>(19.42)   | 82<br>(19.20)   | 0.71 | 37<br>(21.39)   | 47<br>(21.76)   | 110<br>(22.36)  | 0.65 |
| 40-65                                 | 284<br>(61.61)  | 282<br>(61.57)  | 557<br>(60.61)  |      | 179<br>(62.15)  | 155<br>(64.05)  | 263<br>(61.59)  |      | 105<br>(60.69)  | 127<br>(58.80)  | 294<br>(59.76)  |      |
| > 65                                  | 83<br>(18.00)   | 82<br>(17.90)   | 170<br>(18.50)  |      | 52<br>(18.06)   | 40<br>(16.53)   | 82<br>(19.20)   |      | 31<br>(17.92)   | 42<br>(19.44)   | 88<br>(17.89)   |      |
| <b>Co-morbidities, n (%)</b>          |                 |                 |                 |      |                 |                 |                 |      |                 |                 |                 |      |
| Diabetes mellitus                     | 62<br>(13.45)   | 51<br>(11.14)   | 127<br>(13.82)  | 0.1  | 29<br>(13.54)   | 25<br>(10.33)   | 54<br>(12.65)   | 0.92 | 23<br>(13.29)   | 26<br>(12.04)   | 73<br>(14.84)   | 0.13 |
| Hypertension                          | 123<br>(26.68)  | 119<br>(25.98)  | 252<br>(27.42)  | 0.54 | 74<br>(25.69)   | 58<br>(23.97)   | 110<br>(25.76)  | 0.33 | 49<br>(28.32)   | 61<br>(28.24)   | 142<br>(28.86)  | 0.94 |
| Vasculitis                            | 5<br>(1.08)     | 3<br>(0.66)     | 3<br>(0.33)     | 0.07 | NA              | NA              | NA              | 0.11 | NA              | NA              | NA              | 0.32 |
| Arthritis                             | 22<br>(4.77)    | 23<br>(5.02)    | 43<br>(4.68)    | 0.66 | 13<br>(4.51)    | 9<br>(3.72)     | 26<br>(6.09)    | 0.38 | 9<br>(5.20)     | 14<br>(6.48)    | 17<br>(3.46)    | 0.09 |

IQR, interquartile range; SD, standard deviation.

Overall cohort: patients with dermatomyositis and polymyositis.

LPG, long-term pruritic group: receiving antipruritic agents for 84 consecutive days or more.

SPG, short-term pruritic group: receiving antipruritic agents for 42 consecutive days or more, but less than 84 days.

NPG, nonpruritic group: receiving antipruritic agents for less than 42 consecutive days.

**Table 2. Distributions of cancer and all-cause mortality in dermatomyositis and polymyositis cohort, by pruritus status, in 2005–2022.**

|                                                | <b>LPG</b>   | <b>SPG</b>   | <b>NPG</b>   | <b>p</b> |
|------------------------------------------------|--------------|--------------|--------------|----------|
| <b>Overall cohort</b>                          | <b>N=461</b> | <b>N=458</b> | <b>N=919</b> |          |
| <b>Cancer#</b>                                 |              |              |              |          |
| Overall period                                 | 92 (19.96)   | 67 (14.63)   | 95 (10.34)   | 0.0002   |
| Ever registered in 5 years prior to index date | 18 (3.90)    | 21 (4.59)    | 32 (3.48)    | 0.33     |
| Ever registered in 10 years after index date   | 77 (16.70)   | 50 (10.92)   | 67 (7.29)    | 0.0002   |
| Interstitial lung disease                      | 151 (32.75)  | 125 (27.29)  | 283 (30.79)  | 0.39     |
| All-cause mortality                            | 140 (30.37)  | 136 (29.69)  | 347 (37.76)  | <0.0001  |
| Cancer-associated mortality                    | 53 (11.50)   | 31 (6.77)    | 54 (5.88)    | 0.04     |
| <b>Dermatomyositis</b>                         | <b>N=288</b> | <b>N=242</b> | <b>N=427</b> |          |
| <b>Cancer#</b>                                 |              |              |              |          |
| Overall period                                 | 75 (26.04)   | 47 (19.42)   | 57 (13.35)   | 0.11     |
| Ever registered in 5 years prior to index date | 13 (4.51)    | 17 (7.02)    | 23 (5.39)    | 0.43     |
| Ever registered in 10 years after index date   | 63 (21.88)   | 34 (14.05)   | 38 (8.90)    | 0.12     |
| Interstitial lung disease                      | 90 (31.25)   | 75 (30.99)   | 168 (39.34)  | 0.39     |
| All-cause mortality                            | 95 (32.99)   | 76 (31.40)   | 199 (46.60)  | 0.0007   |
| Cancer-associated mortality                    | 46 (15.97)   | 22 (9.09)    | 34 (7.96)    | 0.3      |
| <b>Polymyositis</b>                            | <b>N=173</b> | <b>N=216</b> | <b>N=492</b> |          |
| <b>Cancer#</b>                                 |              |              |              |          |
| Overall period                                 | 17 (9.83)    | 20 (9.26)    | 38 (7.72)    | 0.35     |
| Ever registered in 5 years prior to index date | 5 (2.89)     | 4 (1.85)     | 9 (1.83)     | 0.39     |
| Ever registered in 10 years after index date   | 14 (8.09)    | 16 (7.41)    | 29 (5.89)    | 0.48     |
| Interstitial lung disease                      | 61 (35.26)   | 50 (23.15)   | 115 (23.37)  | 0.24     |
| All-cause mortality                            | 45 (26.01)   | 60 (27.78)   | 148 (30.08)  | 0.03     |
| Cancer-associated mortality                    | 7 (4.05)     | 9 (4.17)     | 20 (4.07)    | 1        |

Data are presented as *n* (%).

Overall cohort: patients with dermatomyositis and polymyositis.

LPG, long-term pruritic group: receiving antipruritic agents for 84 consecutive days or more.

SPG, short-term pruritic group: receiving antipruritic agents for 42 consecutive days or more, but less than 84 days.

NPG, nonpruritic group: receiving antipruritic agents for less than 42 consecutive days.

# Patients had records available in the cancer registry between 5 years prior to and 10 years after the index date.



**Table 3 Event risk in dermatomyositis cohort, 2005-2022.**

|                        | Adjusted hazard ratio (95% confidence interval) |                            |
|------------------------|-------------------------------------------------|----------------------------|
|                        | Newly diagnosed cancer                          | All-cause mortality        |
| <b>Overall</b>         |                                                 |                            |
| Pruritus (Yes vs. No)  | <b>1.492 (1.093-2.036)</b>                      | <b>0.489 (0.419-0.571)</b> |
| Pruritus (vs. No)      |                                                 |                            |
| SPG                    | 1.139 (0.775-1.674)                             | <b>0.468 (0.385-0.568)</b> |
| LPG                    | <b>1.849 (1.314-2.602)</b>                      | <b>0.511 (0.424-0.617)</b> |
| <b>Dermatomyositis</b> |                                                 |                            |
| Pruritus (Yes vs. No)  | <b>1.707 (1.126-2.587)</b>                      | <b>0.413 (0.335-0.509)</b> |
| Pruritus (vs. No)      |                                                 |                            |
| SPG                    | 1.220 (0.733-2.029)                             | <b>0.379 (0.291-0.495)</b> |
| LPG                    | <b>2.107 (1.360-3.266)</b>                      | <b>0.444 (0.349-0.564)</b> |
| <b>Polymyositis</b>    |                                                 |                            |
| Pruritus (Yes vs. No)  | 0.874 (0.523-1.461)                             | <b>0.515 (0.402-0.660)</b> |
| Pruritus (vs. No)      |                                                 |                            |
| SPG                    | 0.889 (0.482-1.639)                             | <b>0.536 (0.396-0.726)</b> |
| LPG                    | 0.855 (0.443-1.652)                             | <b>0.490 (0.355-0.675)</b> |

Data are presented as hazard ratio (95% confidence interval).

Overall cohort: patients with dermatomyositis and polymyositis.

LPG, long-term pruritic group: receiving antipruritic agents for 84 consecutive days or more.

SPG, short-term pruritic group: receiving antipruritic agents for 42 consecutive days or more, but less than 84 days.

NPG, nonpruritic group: receiving antipruritic agents for less than 42 consecutive days.

Post cancer model of patients without baseline cancer adjusted for sex, age, diabetes, hypertension, vasculitis(overall); sex, age, diabetes, hypertension (dermatomyositis); age, hypertension (polymyositis).

Post Interstitial lung disease model of patients without baseline cancer adjusted for sex, age, arthritis (overall, dermatomyositis); age (polymyositis).

All-cause death model adjusted for sex, age, diabetes, hypertension, arthritis, cancer, interstitial lung disease (overall); sex, age, diabetes, hypertension, cancer, interstitial lung disease (dermatomyositis, polymyositis).

Entire database

Covers more than 99% of Taiwan's 23 million residents

Index period

medRxiv preprint doi: <https://doi.org/10.1101/2024.09.26.24314441>; this version posted September 27, 2024. The copyright holder for this preprint (which was not certified by peer review) is the author/funder, who has granted medRxiv a license to display the preprint in perpetuity. All rights reserved. No reuse allowed without permission.

January 2005

Patients with dermatomyositis and polymyositis  
N=2723

December 2022

1. aged under 18-year-old, and unknown sex (N = 122)

2. other diseases associated with pruritus (N = 469)

Dermatomyositis, Polymyositis  
N=2132

Categorize patients according to prescription history of anti-pruritic agents for 42 consecutive days or more

Study sample size

Pruritic group  
N=1180

Non-pruritic group  
N=952

Pruritic group  
N=919

Matching by gender and date of birth ( $\pm 2$  years) in a 1:1 ratio

Non-pruritic group  
N=919

Antipruritic agents for 84 days or more

Antipruritic agents for 42 to 83 days

Long-term pruritic group  
N=461

Short-term pruritic group  
N=458

Non-pruritic group  
N=919

# Overall cohort

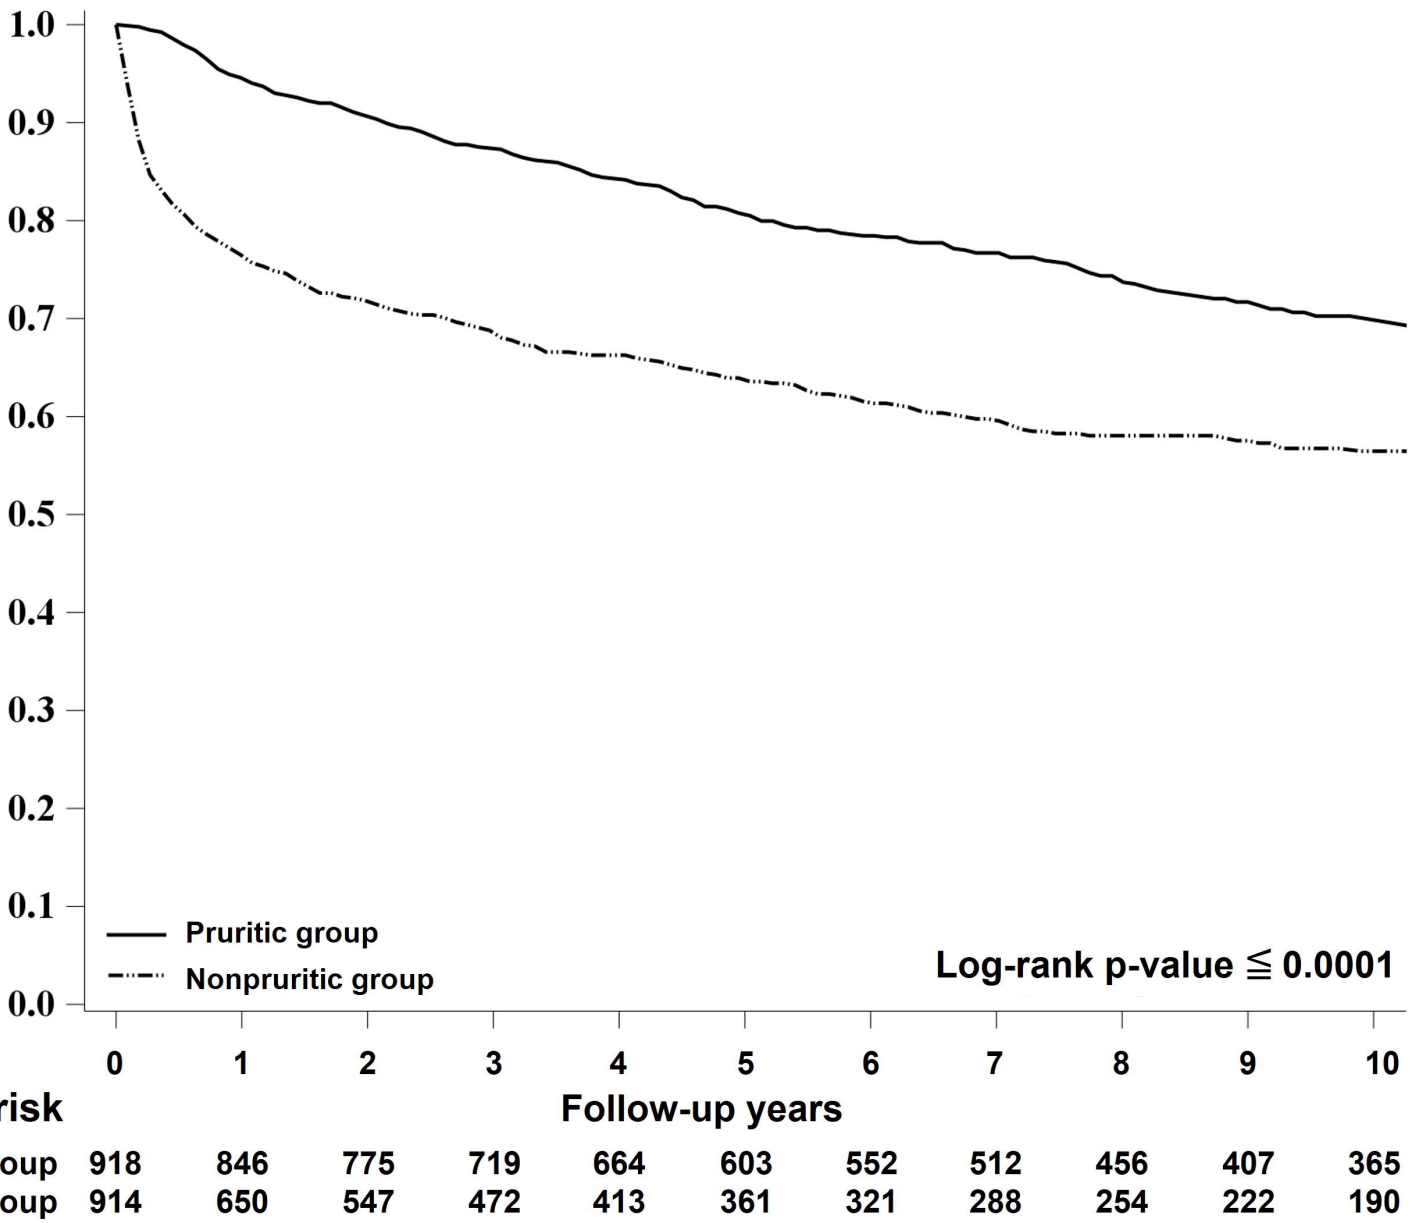

# Dermatomyositis

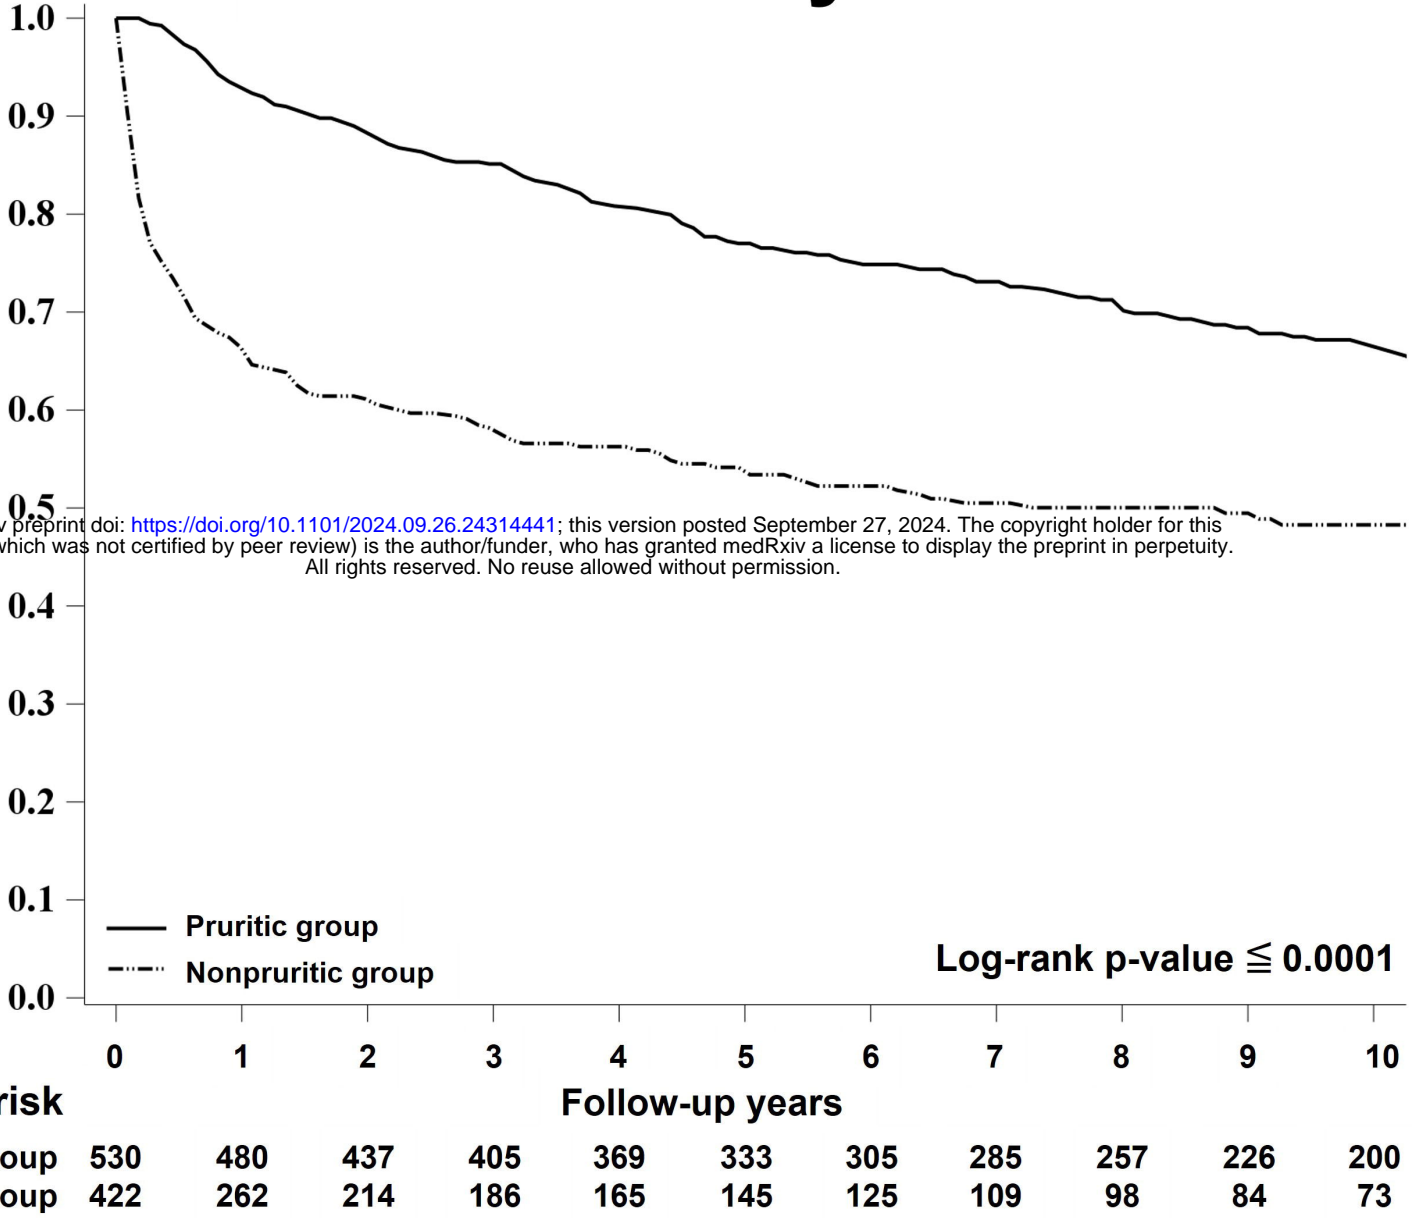

# Polymyositis

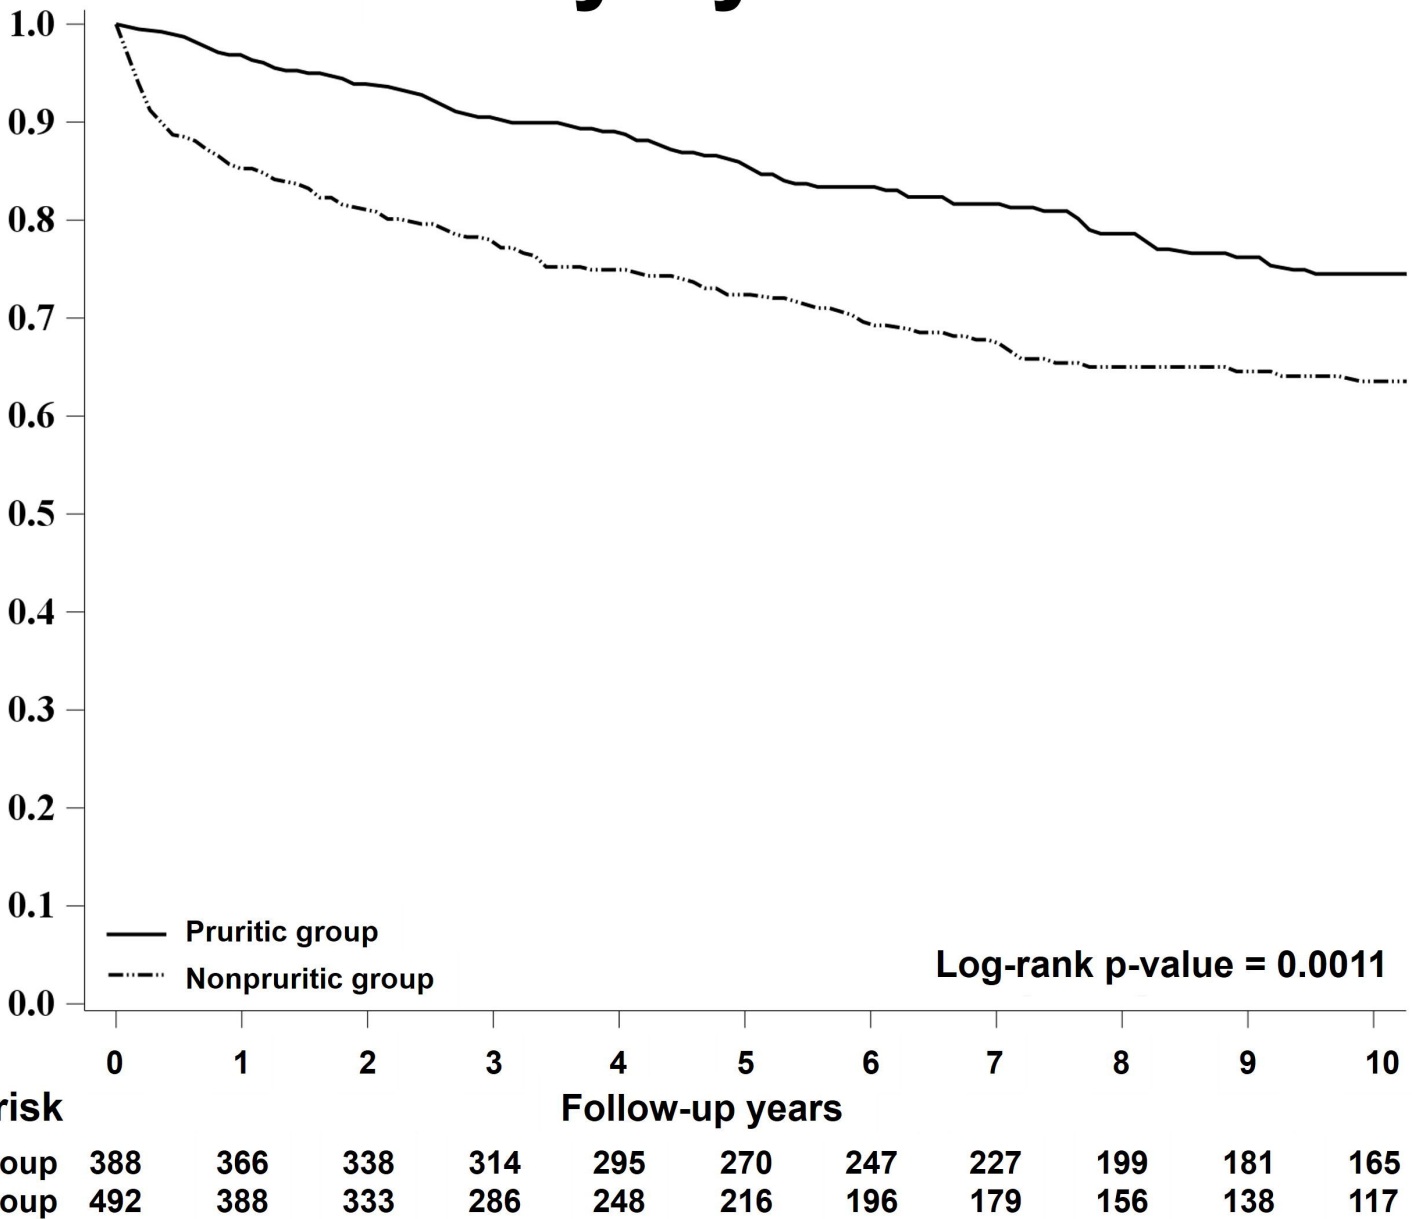

Source: https://medrxiv.org/content/10.1101/2024.09.26.24314441v1.full.pdf
